# Supplementary material for: Dietary Heat-Treatment Contaminants Exposure and Cancer: A Case Study from Turkey
Source: MDPI journal article supplement (doi:10.3390/foods12122320), 2023-06-09
Supplement: s1 [file s1]

# Dietary Heat-Treatment Contaminants Exposure and Cancer: A Case Study from Türkiye

Hilal Pekmezci <sup>1,\*</sup> and Burhan Basaran<sup>2</sup>

<sup>1</sup>Department of Elderly Care, Health Care Services Vocational School, Recep Tayyip Erdogan University, Rize, Türkiye.  
hilal.pekmezci@erdogan.edu.tr ORCID ID: 0000-0003-2157-4014

<sup>2</sup>Department of Nutrition and Dietetics, Faculty of Health Recep Tayyip Erdogan University, Rize, Türkiye.  
burhan.basaran@erdogan.edu.tr, ORCID ID: 0000-0001-6506-6113

\* Correspondence: hilal.pekmezci@erdogan.edu.tr

**Supplementary Table 1.** Definition of dependent and independent variables (Regression analysis).

| Dependent variables   |                                                              |                                        |                                           |                                   |                              |
|-----------------------|--------------------------------------------------------------|----------------------------------------|-------------------------------------------|-----------------------------------|------------------------------|
| Models                | Model 1                                                      | Model 2                                | Model 3                                   | Model 4                           | Model 5                      |
|                       | Other (0)                                                    | Other (0)                              | Other (0)                                 | Other (0)                         | Other (0)                    |
| Types of cancer       | Cancers in the respiratory system (1)                        | Cancers in the reproductive system (1) | Cancers in the gastrointestinal tract (1) | Cancers in the urinary system (1) | Cancers in other systems (1) |
| Independent variables |                                                              |                                        |                                           |                                   |                              |
|                       | A. Total (Food groups)                                       |                                        |                                           | Meat (red)                        |                              |
|                       | B. Consumption frequency (Food groups)                       |                                        |                                           | Meat (white)                      |                              |
|                       | C. Portion amount (Food groups)                              |                                        |                                           | Meat (fish)                       |                              |
|                       | D. Cooking method (Food groups)                              |                                        |                                           | French fries                      |                              |
|                       | E. Consumption mode (Food groups)                            |                                        |                                           | Bread                             |                              |
|                       |                                                              |                                        |                                           | Coffee (instant)                  |                              |
|                       | F. Frequency of consumption (Total), Portion amount (Total), |                                        |                                           | Coffee (ready to drink)           |                              |
|                       | Cooking method n (Total), Consumption mode (Total)           |                                        |                                           | Coffee (Turkish coffee)           |                              |
|                       |                                                              |                                        |                                           | Black tea                         |                              |

<sup>a</sup> Reproductive system cancer types=Breast, uterus, ovary. <sup>b</sup> Gastrointestinal system cancer types=esophagus, stomach, colorectum, pancreas, liver. <sup>c</sup> Urinary system cancer types=Prostate, bladder, kidney. <sup>d</sup> Respiratory cancer types=Lung, larynx, oral cavity/pharyngeal. <sup>e</sup> Other system cancer types= Brain, thyroid, lymphatic malignancies, skin, oro and hypopharynx, hematology.
